# Supplementary material for: Machine learning methods for detecting urinary tract infection and analysing daily living activities in people with dementia
Source: PubMed Central journal article supplement (PMC6333356; doi:10.1371/journal.pone.0209909), 2019-01-15
Supplement: pone.0209909.s001.pdf [file pone.0209909.s001.pdf]

## Supporting information

---

**S1 Algorithm:** Decomposition-based Profiling of User Behaviour

---

**Input:** Matrix of column data  $V$ , desired dimension of feature space  $r$

- 1 Factor  $V \approx WH$ , where  $W$  is  $m \times r$  and  $H$  is  $r \times n$ .
- 2 Use Affinity propagation clustering Algorithm [?], to cluster the columns of  $H$ , that are the coordinates of the data points after projection into a  $r$ -dimensional space.

**Output:** Cluster of data points that represents the SFPs.

---
