# Supplementary material for: Machine learning methods for detecting urinary tract infection and analysing daily living activities in people with dementia
Source: PubMed Central journal article supplement (PMC6333356; doi:10.1371/journal.pone.0209909), 2019-01-15

## Supporting information

**S3 Algorithm:** Two level rule-based algorithm to analyse environmental data and extract night-time sleep pattern

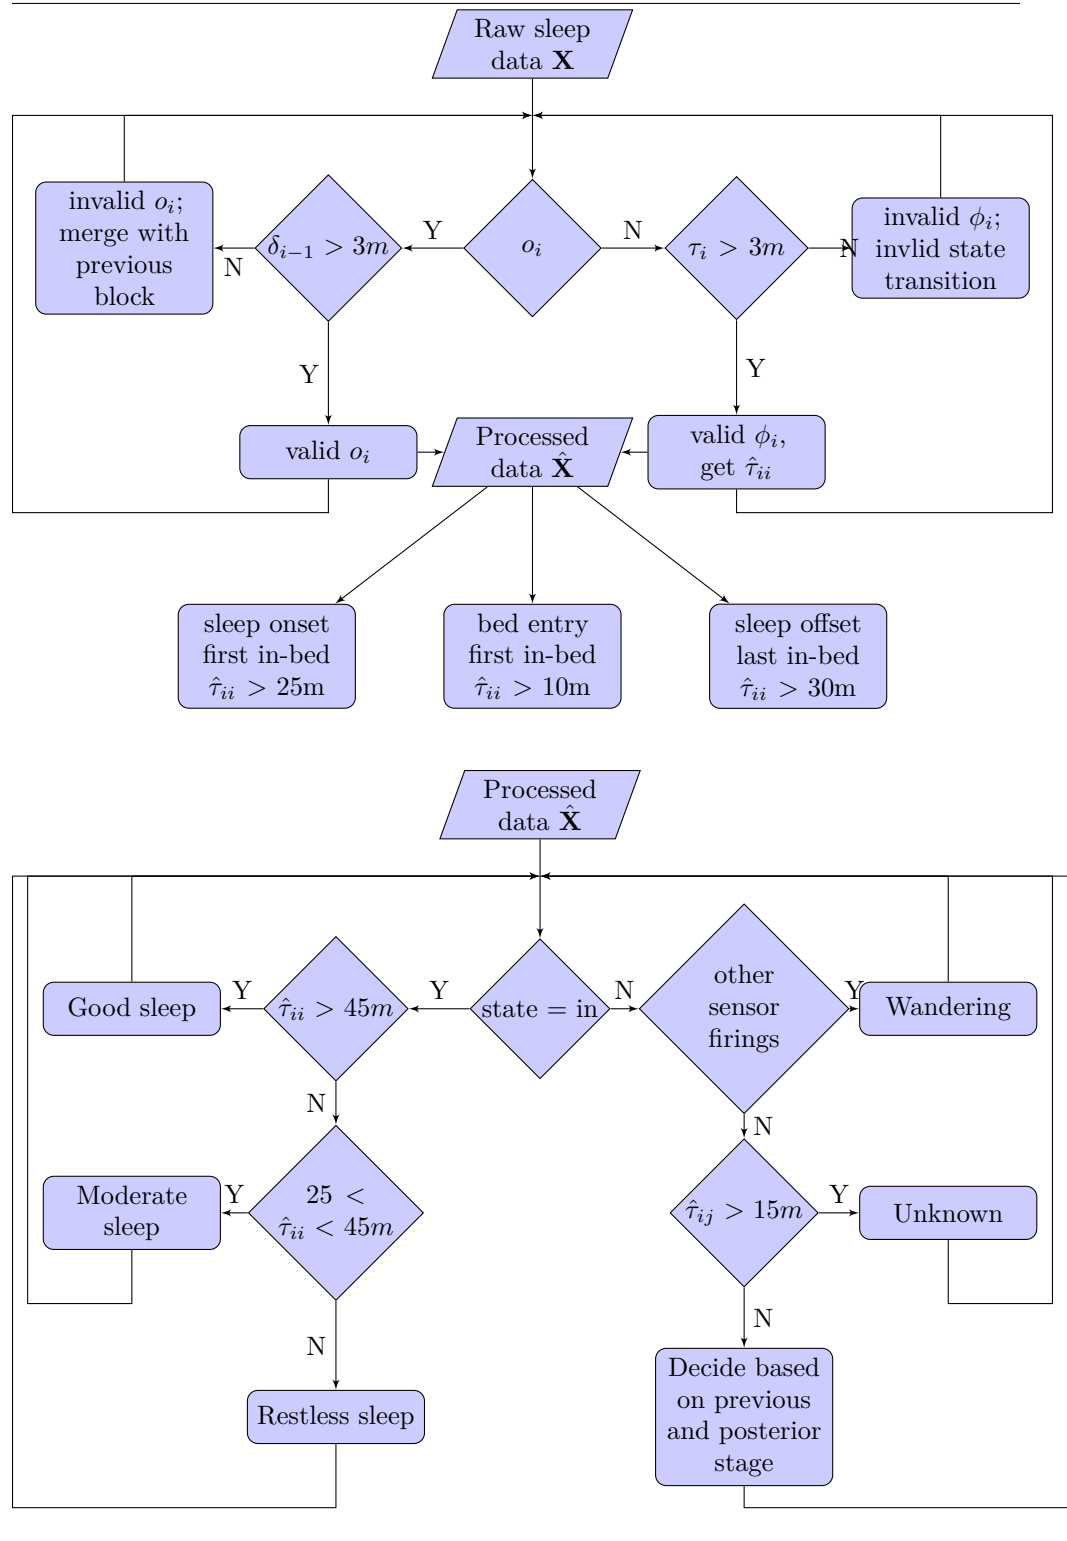

Supplement: pone.0209909.s003.pdf [file pone.0209909.s003.pdf]
