# Supplementary material for: Machine learning methods for detecting urinary tract infection and analysing daily living activities in people with dementia
Source: PLOS journal article supplement (doi:10.1371/journal.pone.0209909), 2019-01-15
Supplement: S2 (10.1371/journal.pone.0209909.s002) [file journal.pone.0209909.s002]

## Supporting information

---

### S2 Algorithm: Cluster Categorisation

---

**Input:** A one-dimensional array  $A$  consisting of  $M$  elements, each representing the count of SFPs within each cluster obtained by Algorithm I

- 1 Perform median absolute deviation (MAD) analysis to calculate a MAD score.
- 2 Use the following equation to assign categories:

$$X - D \times MAD < x_i < X + D \times MAD \quad (1)$$

$$\frac{x_i - X}{MAD} > \|\pm D\| \text{ where } D \text{ is the rejection criteria} \quad (2)$$

**Output:** Based on the values of  $D$ , assign a cluster to either a HSFP, LSFP or RSFP category.

---
